# Supplementary material
Source: PubMed Central journal article supplement (PMC9729896)

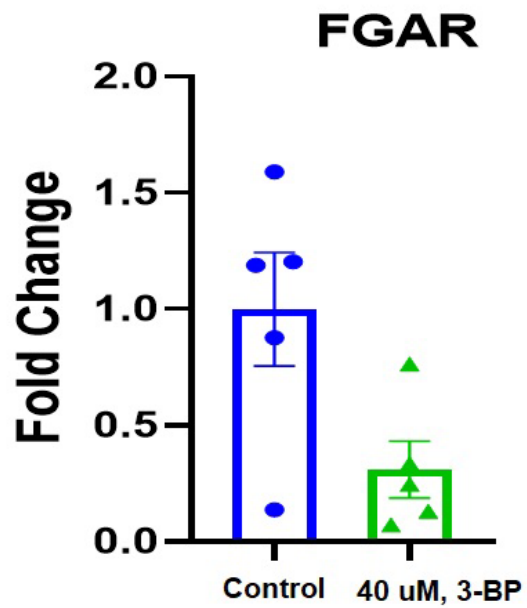

Supplementary Figure 1. Down regulation of FGAR in 40  $\mu$ M, 3-BP treated Panc-2 cells.

Supplement: ajcr0012-4977-f10.pdf [file ajcr0012-4977-f10.pdf]
